# Supplementary material
Source: HighWire-hosted journal article supplement (https://bmjopen.bmj.com/content/7/12/e017789)
Supplement: inline-supplementary-material-1 [file inline-supplementary-material-1.pdf]

**Supplemental table 1 - Proportion of missing data among singleton live births from 37 to 40 weeks' gestation.**

|                                              | n (%)                 |
|----------------------------------------------|-----------------------|
| <b>Study population</b>                      | <b>18,652 (100.0)</b> |
| Capacity of hospital                         | 0 (0.0)               |
| Baby's friendly initiative hospital          | 0 (0.0)               |
| Type of payment for birth                    | 0 (0.0)               |
| Age                                          | 3 (0.1)               |
| Years of schooling                           | 94 (0.5)              |
| Previous births                              | 0 (0.0)               |
| Previous caesarean section                   | 64 (0.3)              |
| Previous stillbirth or neonatal death        | 64 (0.3)              |
| Maternal or foetal condition                 | 64 (0.3)              |
| Precursors of birth                          | 0 (0.0)               |
| Mode of Birth                                | 0 (0.0)               |
| Gestational age                              | 0 (0.0)               |
| Resuscitation at labour ward                 | 61 (0.3)              |
| Oxygen therapy during hospital stay          | 60 (0.3)              |
| Neonatal ICU admission                       | 61 (0.3)              |
| Neonatal death                               | 0 (0.0)               |
| Transient tachypnoea of the newborn          | 189 (1.0)             |
| Antibiotic use during hospital stay          | 188 (1.0)             |
| Hypoglycemia in the first 48h of life        | 189 (1.0)             |
| Phototherapy in the first 72h of life        | 190 (1.0)             |
| Breastfeeding up to one hour after birth     | 1,114 (5.9)           |
| Exclusive breastfeeding during hospital stay | 20 (0.1)              |
| Readmission for Phototherapy*                | 51 (0.4)              |

\* Follow-up study population as the denominator (n= 12,775).
