# Supplementary material
Source: HighWire-hosted journal article supplement (https://bmjopen.bmj.com/content/7/12/e017789)
Supplement: inline-supplementary-material-2 [file inline-supplementary-material-2.pdf]

**Supplemental Table 2 – Comparison of maternal characteristics between respondents and non-respondents in the follow-up interview among singleton live births from 37 to 40 weeks' gestation.**

| Variables                          | Non-respondent<br>n= 6,111 | Respondent<br>n= 12,775 | p-value* |
|------------------------------------|----------------------------|-------------------------|----------|
|                                    | n (%)                      | n (%)                   |          |
| <b>Geographic region</b>           |                            |                         |          |
| North                              | 893 (14.6)                 | 877 (6.9)               | <0.001   |
| Northeast                          | 2246 (36.8)                | 3091 (24.2)             |          |
| Southeast                          | 2213 (36.2)                | 5981 (46.8)             |          |
| South                              | 408 (6.7)                  | 1963 (15.4)             |          |
| Center-west                        | 351 (5.7)                  | 863 (6.8)               |          |
| <b>Municipality</b>                |                            |                         |          |
| Capital                            | 1967 (32.2)                | 4854 (38.0)             | 0,006    |
| Non-capital                        | 4144 (67.8)                | 7921 (62.0)             |          |
| <b>Type of hospital governance</b> |                            |                         |          |
| Public                             | 2813 (46.0)                | 4561 (35.7)             | <0.001   |
| Mixed                              | 2507 (41.0)                | 5925 (46.4)             |          |
| Private                            | 791 (12.9)                 | 2289 (17.9)             |          |
| <b>Payment for birth</b>           |                            |                         |          |
| Public                             | 5098 (83.4)                | 9647 (75.5)             | <0.001   |
| Private                            | 1013 (16.6)                | 3128 (24.5)             |          |
| <b>Maternal age</b>                |                            |                         |          |
| < 20                               | 1315 (21.5)                | 2084 (16.3)             | <0.001   |
| 20-34                              | 4223 (69.1)                | 9259 (72.5)             |          |
| ≥ 35                               | 573 (9.4)                  | 1432 (11.2)             |          |
| <b>Skin color</b>                  |                            |                         |          |
| White                              | 1771 (29)                  | 4765 (37.3)             | <0.001   |
| Black                              | 568 (9.3)                  | 999 (7.8)               |          |
| Brown                              | 3665 (60)                  | 6827 (53.4)             |          |
| Yellow                             | 67 (1.1)                   | 143 (1.1)               |          |
| Indigenous                         | 40 (0.7)                   | 41 (0.3)                |          |
| <b>Schooling level</b>             |                            |                         |          |
| ≤ 7                                | 2274 (37.2)                | 2587 (20.3)             | <0.001   |
| 8 to 10                            | 1509 (24.7)                | 3234 (25.3)             |          |
| 11 to 14                           | 1885 (30.8)                | 5566 (43.6)             |          |
| ≥ 15                               | 443 (7.2)                  | 1388 (10.9)             |          |
| <b>Previous births</b>             |                            |                         |          |
| Nuliparous                         | 2641 (43.2)                | 6062 (47.5)             | <0.001   |
| 1 to 2                             | 2594 (42.4)                | 5674 (44.4)             |          |
| ≥ 3                                | 876 (14.3)                 | 1039 (8.1)              |          |
| <b>Precursors of birth</b>         |                            |                         |          |
| Spontaneous                        | 3759 (61.5)                | 6939 (54.3)             | <0.001   |
| Provider-initiated                 | 2352 (38.5)                | 5836 (45.7)             |          |
| <b>Mode of Birth</b>               |                            |                         |          |
| Vaginal                            | 3237 (53.0)                | 5810 (45.5)             | <0.001   |
| Caesarean                          | 2874 (47.0)                | 6965 (54.5)             |          |
| <b>Gestational Age</b>             |                            |                         |          |
| 37                                 | 680 (11.1)                 | 1567 (12.3)             | <0.001   |
| 38                                 | 2213 (36.2)                | 3974 (31.1)             |          |
| 39-40                              | 3217 (52.6)                | 7234 (56.6)             |          |

\*  $\chi^2$  Test
